# Supplementary material for: Evolution of Gold and Iron Oxide Nanoparticles in Conjugates with Methotrexate: Synthesis and Anticancer Effects
Source: MDPI journal article supplement (doi:10.3390/ma16083238), 2023-04-19
Supplement: s1 [file s1]

## Supplementary Materials

# Evolution of Gold and Iron Oxide Nanoparticles in Conjugates with Methotrexate: Synthesis and Anticancer Effects

Alexander Vasil'kov <sup>1,\*</sup>, Anastasiia Voronova <sup>1</sup>, Tsvetelina Batsalova <sup>2</sup>, Dzhemal Moten <sup>2</sup>, Alexander Naumkin <sup>1</sup>, Eleonora Shtykova <sup>3</sup>, Vladimir Volkov <sup>3</sup>, Ivanka Teneva <sup>2</sup> and Balik Dzhabazov <sup>2</sup>

<sup>1</sup> A.N. Nesmeyanov Institute of Organoelement Compounds, RAS, 119334 Moscow, Russia

<sup>2</sup> Faculty of Biology, Paisii Hilendarski University of Plovdiv, 4000 Plovdiv, Bulgaria

<sup>3</sup> Shubnikov Institute of Crystallography, FSRC "Crystallography and Photonics", RAS, 119333 Moscow, Russia

\* Correspondence: alexandervasilkov@yandex.ru

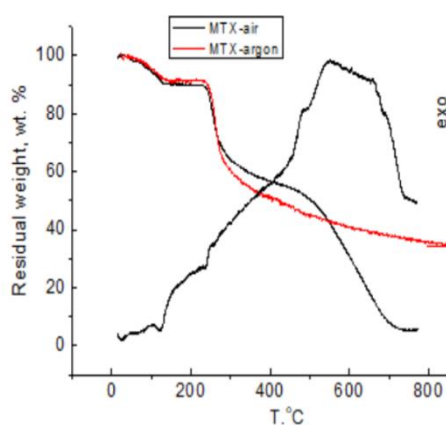

Figure S1. TGA and DTA curves for MTX in air and argon.

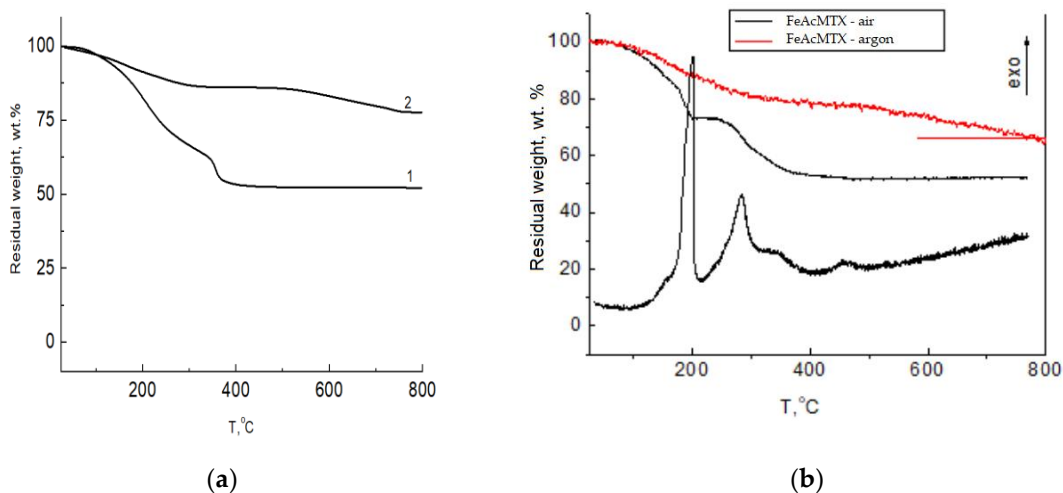

Figure S2. TGA and DTA curves in air and argon: (a) for FaAc (1 - air, 2 - argon); (b) for FeAcMTX.

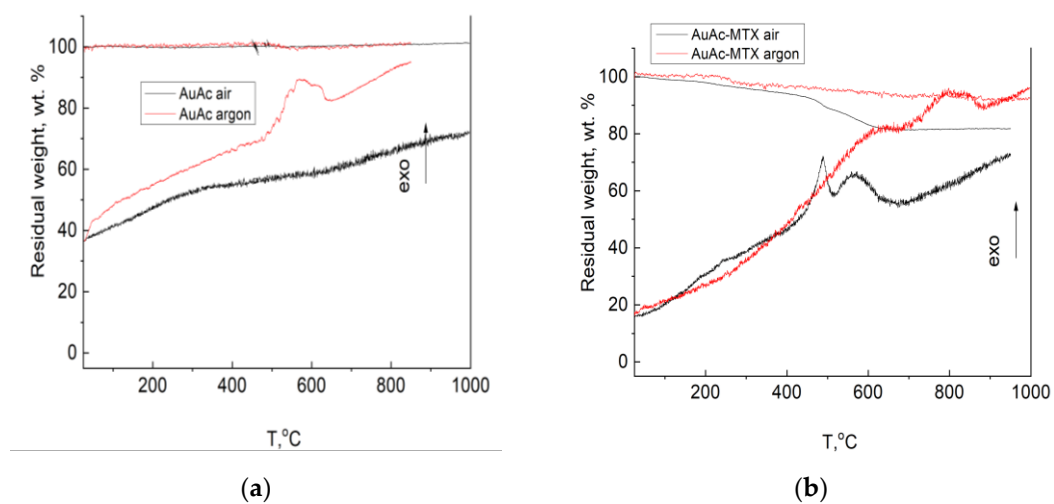

**Figure S3.** TGA and DTA curves in air and argon: (a) for AuAc; (b) for AuAcMTX.

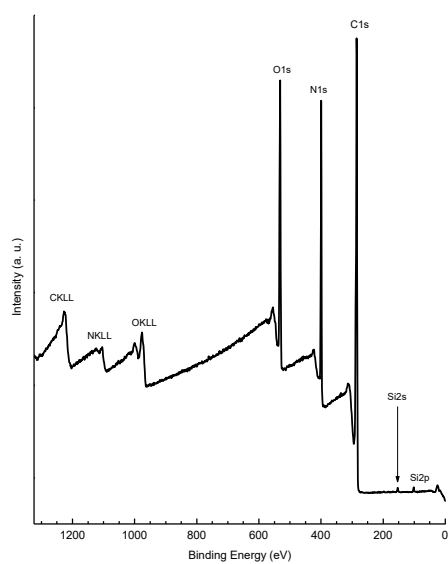

**Figure S4.** Survey XPS spectra of the MTX sample.

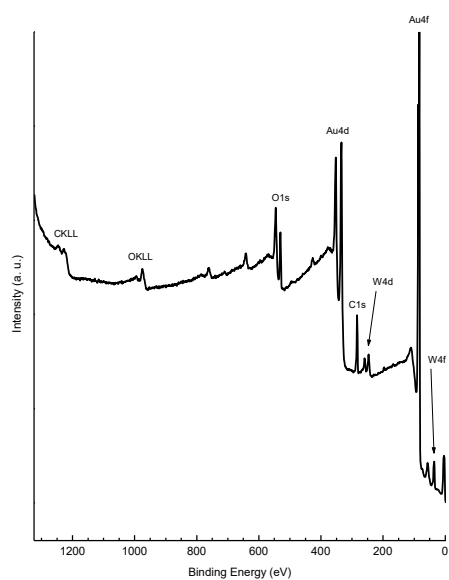

**Figure S5.** Survey XPS spectra of the AuAc sample.

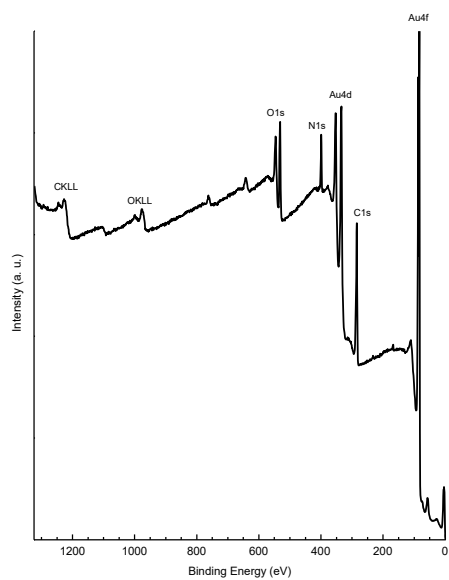

**Figure S6.** Survey XPS spectra of the AuAcMTX sample.

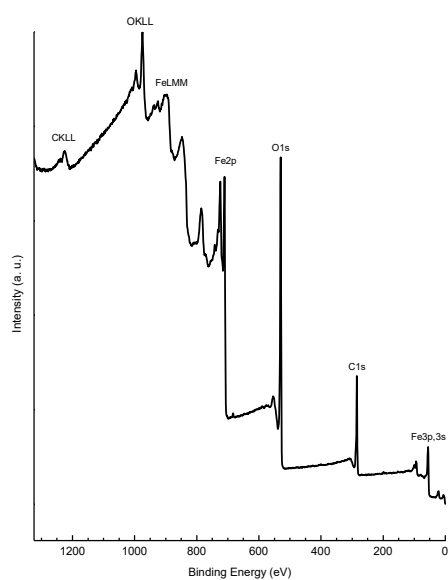

**Figure S7.** Survey XPS spectra of the FeAc sample.

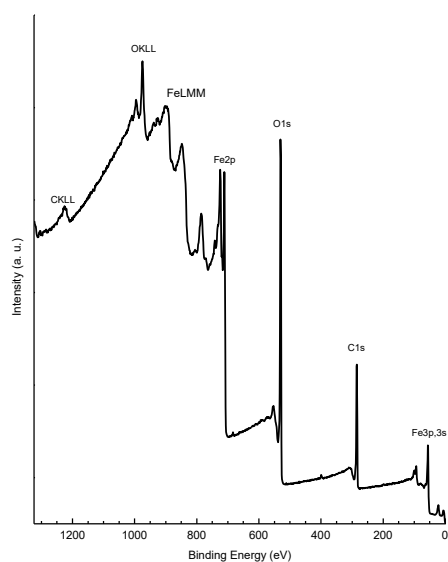

**Figure S8.** Survey XPS spectra of the FeAcMTX sample.
